# Supplementary material
Source: PubMed Central journal article supplement (PMC6763349)
Supplement: NIHMS1047153-supplement-1.pdf [file NIHMS1047153-supplement-1.pdf]

1  
2  
3  
4  
5  
6  
7  
8  
9  
10  
11  
12  
13  
14  
15  
16  
17  
18  
19  
20  
21  
22  
23  
24  
25  
26  
27  
28  
29  
30  
31  
32  
33  
34  
35  
36  
37  
38  
39  
40  
41  
42  
43  
44  
45  
46  
47

Supplemental Table 1. Health related quality of life outcomes across racial/ethnic groups of childhood cancer survivors.

|                          | White, non-Hispanic |      |        | Black, non-Hispanic |      |        |        | Hispanic |      |      |      |
|--------------------------|---------------------|------|--------|---------------------|------|--------|--------|----------|------|------|------|
|                          | Mean                | SE   | P      | Mean                | SE   | P      | P*     | Mean     | SE   | P    | P*   |
| <b>Physical function</b> |                     |      |        |                     |      |        |        |          |      |      |      |
| Sibling                  | 54.30               | 0.20 | -      | 54.30               | 0.98 | -      | -      | 53.04    | 1.55 | -    | -    |
| Survivor                 | 51.83               | 0.09 | -      | 49.72               | 0.57 | -      | -      | 50.27    | 0.43 | -    | -    |
| Difference from sibling  | -2.47               | 0.22 | <0.001 | -4.57               | 1.14 | <0.001 | 0.07   | -2.78    | 1.60 | 0.08 | 0.85 |
| Survivor no CRT          | 52.32               | 0.10 | -      | 51.01               | 0.60 | -      | -      | 50.77    | 0.48 | -    | -    |
| Difference from sibling  | -1.98               | 0.22 | <0.001 | -3.29               | 1.15 | 0.004  | 0.26   | -2.27    | 1.62 | 0.16 | 0.86 |
| Survivor with CRT        | 50.61               | 0.19 | -      | 46.72               | 1.32 | -      | -      | 48.85    | 0.92 | -    | -    |
| Difference from sibling  | -3.69               | 0.28 | <0.001 | -7.58               | 1.66 | <0.001 | 0.02   | -4.19    | 1.80 | 0.02 | 0.78 |
| <b>Role physical</b>     |                     |      |        |                     |      |        |        |          |      |      |      |
| Sibling                  | 52.61               | 0.30 | -      | 54.58               | 0.73 | -      | -      | 52.78    | 1.65 | -    | -    |
| Survivor                 | 51.29               | 0.10 | -      | 49.46               | 0.52 | -      | -      | 49.49    | 0.45 | -    | -    |
| Difference from sibling  | -1.32               | 0.31 | <0.001 | -5.12               | 0.93 | <0.001 | <0.001 | -3.29    | 1.70 | 0.05 | 0.25 |
| Survivor no CRT          | 51.59               | 0.12 | -      | 49.97               | 0.62 | -      | -      | 50.09    | 0.49 | -    | -    |
| Difference from sibling  | -1.01               | 0.32 | 0.001  | -4.61               | 0.96 | <0.001 | <0.001 | -2.69    | 1.70 | 0.11 | 0.33 |
| Survivor with CRT        | 50.53               | 0.20 | -      | 48.27               | 0.95 | -      | -      | 47.81    | 1.04 | -    | -    |
| Difference from sibling  | -2.08               | 0.36 | <0.001 | -6.32               | 1.28 | <0.001 | 0.001  | -4.97    | 1.95 | 0.01 | 0.14 |
| <b>Pain</b>              |                     |      |        |                     |      |        |        |          |      |      |      |
| Sibling                  | 50.43               | 0.18 | -      | 51.36               | 0.95 | -      | -      | 50.02    | 0.93 | -    | -    |
| Survivor                 | 51.64               | 0.11 | -      | 50.16               | 0.59 | -      | -      | 51.27    | 0.43 | -    | -    |
| Difference from sibling  | 1.21                | 0.21 | <0.001 | -1.20               | 1.11 | 0.28   | 0.03   | 1.24     | 1.01 | 0.22 | 0.97 |
| Survivor no CRT          | 51.73               | 0.13 | -      | 50.64               | 0.70 | -      | -      | 51.18    | 0.49 | -    | -    |
| Difference from sibling  | 1.30                | 0.22 | <0.001 | -0.72               | 1.18 | 0.54   | 0.09   | 1.16     | 1.04 | 0.27 | 0.90 |
| Survivor with CRT        | 51.42               | 0.22 | -      | 49.03               | 1.13 | -      | -      | 51.50    | 0.90 | -    | -    |
| Difference from sibling  | 0.99                | 0.29 | 0.001  | -2.33               | 1.47 | 0.11   | 0.03   | 1.48     | 1.27 | 0.25 | 0.71 |
| <b>General health</b>    |                     |      |        |                     |      |        |        |          |      |      |      |
| Sibling                  | 52.10               | 0.35 | -      | 53.04               | 1.59 | -      | -      | 51.33    | 2.29 | -    | -    |
| Survivor                 | 48.72               | 0.12 | -      | 48.07               | 0.60 | -      | -      | 47.15    | 0.50 | -    | -    |
| Difference from sibling  | -3.38               | 0.37 | <0.001 | -4.97               | 1.71 | 0.004  | 0.36   | -4.18    | 2.34 | 0.07 | 0.74 |
| Survivor no CRT          | 48.84               | 0.15 | -      | 48.44               | 0.74 | -      | -      | 47.39    | 0.57 | -    | -    |
| Difference from sibling  | -3.26               | 0.37 | <0.001 | -4.61               | 1.78 | 0.009  | 0.46   | -3.94    | 2.36 | 0.10 | 0.78 |
| Survivor with CRT        | 48.42               | 0.24 | -      | 47.22               | 1.00 | -      | -      | 46.48    | 1.02 | -    | -    |
| Difference from sibling  | -3.67               | 0.43 | <0.001 | -5.82               | 1.88 | 0.002  | 0.26   | -4.85    | 2.50 | 0.05 | 0.64 |

Supplemental Table 1 continued. Health related quality of life outcomes across racial/ethnic groups of childhood cancer survivors.

| <b>Vitality</b>         |       |      |        |       |      |        |        |       |      |        |       |
|-------------------------|-------|------|--------|-------|------|--------|--------|-------|------|--------|-------|
| Sibling                 | 50.11 | 0.36 | -      | 55.51 | 2.52 | -      | -      | 50.63 | 1.99 | -      | -     |
| Survivor                | 49.23 | 0.11 | -      | 50.19 | 0.59 | -      | -      | 49.70 | 0.47 | -      | -     |
| Difference from sibling | -0.89 | 0.38 | 0.02   | -5.32 | 2.61 | 0.04   | 0.09   | -0.93 | 2.03 | 0.65   | 0.99  |
| Survivor no CRT         | 49.31 | 0.14 | -      | 50.18 | 0.70 | -      | -      | 49.69 | 0.51 | -      | -     |
| Difference from sibling | -0.80 | 0.39 | 0.04   | -5.34 | 2.63 | 0.04   | 0.09   | -0.94 | 2.03 | 0.64   | 0.95  |
| Survivor with CRT       | 49.01 | 0.23 | -      | 50.22 | 1.12 | -      | -      | 49.74 | 1.08 | -      | -     |
| Difference from sibling | -1.10 | 0.43 | 0.01   | -5.29 | 2.79 | 0.06   | 0.14   | -0.89 | 2.26 | 0.69   | 0.93  |
| <b>Role emotional</b>   |       |      |        |       |      |        |        |       |      |        |       |
| Sibling                 | 51.12 | 0.35 | -      | 51.62 | 2.28 | -      | -      | 52.73 | 1.25 | -      | -     |
| Survivor                | 50.45 | 0.11 | -      | 49.66 | 0.52 | -      | -      | 48.62 | 0.50 | -      | -     |
| Difference from sibling | -0.67 | 0.37 | 0.07   | -1.96 | 2.37 | 0.41   | 0.59   | -4.11 | 1.35 | 0.002  | 0.01  |
| Survivor no CRT         | 50.47 | 0.13 | -      | 49.59 | 0.61 | -      | -      | 48.72 | 0.59 | -      | -     |
| Difference from sibling | -0.65 | 0.37 | 0.08   | -2.04 | 2.38 | 0.39   | 0.56   | -4.01 | 1.39 | 0.004  | 0.02  |
| Survivor with CRT       | 50.38 | 0.21 | -      | 49.84 | 1.01 | -      | -      | 48.33 | 0.93 | -      | -     |
| Difference from sibling | -0.74 | 0.41 | 0.07   | -1.78 | 2.54 | 0.48   | 0.68   | -4.40 | 1.55 | 0.005  | 0.02  |
| <b>Social function</b>  |       |      |        |       |      |        |        |       |      |        |       |
| Sibling                 | 51.66 | 0.33 | -      | 56.03 | 0.68 | -      | -      | 53.37 | 1.02 | -      | -     |
| Survivor                | 50.19 | 0.11 | -      | 48.93 | 0.53 | -      | -      | 48.04 | 0.48 | -      | -     |
| Difference from sibling | -1.47 | 0.35 | <0.001 | -7.11 | 0.85 | <0.001 | <0.001 | -5.33 | 1.13 | <0.001 | 0.001 |
| Survivor no CRT         | 50.39 | 0.13 | -      | 49.18 | 0.63 | -      | -      | 48.18 | 0.55 | -      | -     |
| Difference from sibling | -1.26 | 0.36 | <0.001 | -6.86 | 0.93 | <0.001 | <0.001 | -5.18 | 1.16 | <0.001 | 0.001 |
| Survivor with CRT       | 49.69 | 0.21 | -      | 48.33 | 0.99 | -      | -      | 47.62 | 0.99 | -      | -     |
| Difference from sibling | -1.97 | 0.39 | <0.001 | -7.70 | 1.17 | <0.001 | <0.001 | -5.75 | 1.43 | <0.001 | 0.01  |
| <b>Mental health</b>    |       |      |        |       |      |        |        |       |      |        |       |
| Sibling                 | 50.70 | 0.35 | -      | 55.75 | 1.42 | -      | -      | 52.93 | 1.40 | -      | -     |
| Survivor                | 50.01 | 0.11 | -      | 49.97 | 0.65 | -      | -      | 49.06 | 0.49 | -      | -     |
| Difference from sibling | -0.69 | 0.36 | 0.06   | -5.78 | 1.49 | <0.001 | 0.001  | -3.87 | 1.45 | 0.008  | 0.03  |
| Survivor no CRT         | 50.08 | 0.14 | -      | 50.18 | 0.75 | -      | -      | 48.82 | 0.54 | -      | -     |
| Difference from sibling | -0.63 | 0.37 | 0.09   | -5.57 | 1.59 | <0.001 | 0.002  | -4.11 | 1.47 | 0.005  | 0.02  |
| Survivor with CRT       | 49.86 | 0.22 | -      | 49.49 | 1.30 | -      | -      | 49.72 | 1.10 | -      | -     |
| Difference from sibling | -0.84 | 0.41 | 0.04   | -6.26 | 1.77 | <0.001 | 0.003  | -3.21 | 1.77 | 0.07   | 0.19  |

1  
2  
3  
4  
5  
6  
7  
8  
9  
10  
11  
12  
13  
14  
15  
16  
17  
18  
19  
20  
21  
22  
23  
24  
25  
26  
27  
28  
29  
30  
31  
32  
33  
34  
35  
36  
37  
38  
39  
40  
41  
42  
43  
44  
45  
46  
47

Supplemental Table 1 continued. Health related quality of life outcomes across racial/ethnic groups of childhood cancer survivors.

| <b>Physical component summary</b> |       |      |        |       |      |        |        |       |      |       |       |
|-----------------------------------|-------|------|--------|-------|------|--------|--------|-------|------|-------|-------|
| Sibling                           | 53.74 | 0.28 | -      | 53.48 | 0.85 | -      | -      | 52.04 | 1.96 | -     | -     |
| Survivor                          | 51.42 | 0.10 | -      | 49.15 | 0.53 | -      | -      | 50.03 | 0.42 | -     | -     |
| Difference from sibling           | -2.32 | 0.30 | <0.001 | -4.33 | 1.00 | <0.001 | 0.05   | -2.01 | 1.99 | 0.31  | 0.88  |
| Survivor no CRT                   | 51.76 | 0.12 | -      | 50.18 | 0.62 | -      | -      | 50.54 | 0.46 | -     | -     |
| Difference from sibling           | -1.98 | 0.30 | <0.001 | -3.29 | 1.05 | 0.002  | 0.23   | -1.50 | 1.99 | 0.45  | 0.81  |
| Survivor with CRT                 | 50.56 | 0.21 | -      | 46.72 | 1.01 | -      | -      | 48.63 | 0.95 | -     | -     |
| Difference from sibling           | -3.18 | 0.35 | <0.001 | -6.76 | 1.32 | <0.001 | 0.008  | -3.41 | 2.18 | 0.12  | 0.92  |
| <b>Mental component summary</b>   |       |      |        |       |      |        |        |       |      |       |       |
| Sibling                           | 49.61 | 0.38 | -      | 55.52 | 1.37 | -      | -      | 52.42 | 1.40 | -     | -     |
| Survivor                          | 49.30 | 0.12 | -      | 49.80 | 0.60 | -      | -      | 48.23 | 0.51 | -     | -     |
| Difference from sibling           | -0.31 | 0.39 | 0.43   | -5.73 | 1.49 | <0.001 | <0.001 | -4.19 | 1.47 | 0.004 | 0.01  |
| Survivor no CRT                   | 49.27 | 0.15 | -      | 49.42 | 0.72 | -      | -      | 48.00 | 0.58 | -     | -     |
| Difference from sibling           | -0.35 | 0.40 | 0.39   | -6.10 | 1.55 | <0.001 | <0.001 | -4.42 | 1.50 | 0.003 | 0.008 |
| Survivor with CRT                 | 49.39 | 0.23 | -      | 50.67 | 1.11 | -      | -      | 48.88 | 1.08 | -     | -     |
| Difference from sibling           | -0.22 | 0.44 | 0.61   | -4.85 | 1.72 | 0.005  | 0.009  | -3.55 | 1.76 | 0.04  | 0.07  |

SE, standard error; P=p-value for comparison to siblings of same race/ethnicity group; P\*=p-value for comparison of the difference between survivor and sibling, referenced to non-Hispanic white survivor and sibling difference.

Adjusted for sex, age at follow-up, year at diagnosis, methotrexate exposure (intravenous and intrathecal), corticosteroid exposure and any CTCAE grade 3-4 chronic medical condition.

Supplemental Table 2. Emotional and health related quality of life outcomes across racial/ethnic groups of childhood cancer survivors with adjustment for current socioeconomic status.

| Survivor-Sibling Difference           | White, non-Hispanic |            | Black, non-Hispanic |        |            |             | Hispanic     |       |            |             |
|---------------------------------------|---------------------|------------|---------------------|--------|------------|-------------|--------------|-------|------------|-------------|
|                                       | Mean w/o SES        | Mean w SES | Mean w/o SES        | P      | Mean w SES | P*          | Mean w/o SES | P     | Mean w SES | P*          |
| <b>Emotional Health</b>               |                     |            |                     |        |            |             |              |       |            |             |
| <b>Depression</b>                     |                     |            |                     |        |            |             |              |       |            |             |
| Overall                               | 1.09                | 0.77       | 1.49                | 0.75   | 0.62       | 0.91        | 3.59         | 0.004 | 3.21       | 0.005       |
| Survivor no CRT                       | 0.91                | 0.74       | 1.26                | 0.79   | 0.62       | 0.93        | 3.52         | 0.004 | 3.23       | 0.007       |
| Survivor with CRT                     | 1.57                | 0.87       | 2.09                | 0.77   | 0.64       | 0.90        | 3.78         | 0.09  | 3.13       | 0.08        |
| <b>Anxiety</b>                        |                     |            |                     |        |            |             |              |       |            |             |
| Overall                               | 0.09                | -0.16      | 0.87                | 0.52   | 0.09       | 0.84        | 1.64         | 0.13  | 1.25       | 0.16        |
| Survivor no CRT                       | 0.29                | 0.14       | 1.19                | 0.48   | 0.61       | 0.72        | 1.67         | 0.19  | 1.34       | 0.25        |
| Survivor with CRT                     | -0.47               | -0.98      | 0.04                | 0.71   | -1.23      | 0.86        | 1.54         | 0.14  | 0.97       | 0.14        |
| <b>Somatization</b>                   |                     |            |                     |        |            |             |              |       |            |             |
| Overall                               | 1.03                | 0.78       | 3.00                | 0.11   | 2.28       | 0.22        | 1.43         | 0.67  | 1.07       | 0.75        |
| Survivor no CRT                       | 1.00                | 0.87       | 2.70                | 0.18   | 2.24       | 0.28        | 1.24         | 0.80  | 0.96       | 0.93        |
| Survivor with CRT                     | 1.12                | 0.52       | 3.76                | 0.11   | 2.39       | 0.25        | 2.03         | 0.47  | 1.44       | 0.46        |
| <b>Global severity index</b>          |                     |            |                     |        |            |             |              |       |            |             |
| Overall                               | 0.78                | 0.43       | 2.52                | 0.23   | 1.51       | 0.47        | 2.85         | 0.05  | 2.39       | <b>0.06</b> |
| Survivor no CRT                       | 0.74                | 0.54       | 2.33                | 0.30   | 1.58       | 0.49        | 2.76         | 0.06  | 2.39       | 0.09        |
| Survivor with CRT                     | 0.90                | 0.14       | 3.02                | 0.25   | 1.32       | 0.53        | 3.12         | 0.14  | 2.39       | 0.13        |
| <b>Health Related Quality of Life</b> |                     |            |                     |        |            |             |              |       |            |             |
| <b>Physical function</b>              |                     |            |                     |        |            |             |              |       |            |             |
| Overall                               | -2.47               | -2.04      | -4.57               | 0.07   | -4.07      | 0.05        | -2.78        | 0.85  | -1.94      | 0.95        |
| Survivor no CRT                       | -1.98               | -1.76      | -3.29               | 0.26   | -3.14      | 0.18        | -2.27        | 0.86  | -1.61      | 0.93        |
| Survivor with CRT                     | -3.69               | -2.75      | -7.58               | 0.02   | -6.25      | 0.03        | -4.19        | 0.78  | -2.87      | 0.95        |
| <b>Role physical</b>                  |                     |            |                     |        |            |             |              |       |            |             |
| Overall                               | -1.32               | -0.89      | -5.12               | <0.001 | -4.72      | <0.001      | -3.29        | 0.25  | -2.48      | 0.37        |
| Survivor no CRT                       | -1.01               | -0.78      | -4.61               | <0.001 | -4.50      | <0.001      | -2.69        | 0.33  | -2.04      | 0.48        |
| Survivor with CRT                     | -2.08               | -1.17      | -6.32               | 0.001  | -5.23      | 0.001       | -4.97        | 0.14  | -3.72      | 0.20        |
| <b>Pain</b>                           |                     |            |                     |        |            |             |              |       |            |             |
| Overall                               | 1.21                | 1.55       | -1.20               | 0.03   | -0.41      | <b>0.09</b> | 1.24         | 0.97  | 1.61       | 0.95        |
| Survivor no CRT                       | 1.30                | 1.45       | -0.72               | 0.09   | -0.19      | 0.17        | 1.16         | 0.90  | 1.40       | 0.97        |
| Survivor with CRT                     | 0.99                | 1.79       | -2.33               | 0.03   | -0.93      | <b>0.06</b> | 1.48         | 0.71  | 2.19       | 0.75        |
| <b>General health</b>                 |                     |            |                     |        |            |             |              |       |            |             |
| Overall                               | -3.38               | -2.92      | -4.97               | 0.36   | -4.48      | 0.40        | -4.18        | 0.74  | -3.20      | 0.91        |
| Survivor no CRT                       | -3.26               | -3.02      | -4.61               | 0.46   | -4.45      | 0.46        | -3.94        | 0.78  | -3.11      | 0.97        |
| Survivor with CRT                     | -3.67               | -2.68      | -5.82               | 0.26   | -4.56      | 0.35        | -4.85        | 0.64  | -3.44      | 0.77        |

Supplemental Table 2 continued. Emotional and health related quality of life outcomes across racial/ethnic groups of childhood cancer survivors with adjustment for current socioeconomic status.

| <b>Vitality</b>                   |       |       |       |        |       |        |       |       |       |             |
|-----------------------------------|-------|-------|-------|--------|-------|--------|-------|-------|-------|-------------|
| Overall                           | -0.89 | -0.57 | -5.32 | 0.09   | -5.26 | 0.09   | -0.93 | 0.99  | -0.30 | 0.89        |
| Survivor no CRT                   | -0.80 | -0.62 | -5.34 | 0.09   | -5.40 | 0.09   | -0.94 | 0.95  | 0.38  | 0.91        |
| Survivor with CRT                 | -1.10 | -0.46 | -5.29 | 0.14   | -4.95 | 0.12   | -0.89 | 0.93  | -0.05 | 0.86        |
| <b>Role emotional</b>             |       |       |       |        |       |        |       |       |       |             |
| Overall                           | -0.67 | -0.27 | -1.96 | 0.59   | -1.69 | 0.55   | -4.11 | 0.01  | -3.35 | 0.02        |
| Survivor no CRT                   | -0.65 | -0.41 | -2.04 | 0.56   | -1.99 | 0.51   | -4.01 | 0.02  | -3.36 | 0.04        |
| Survivor with CRT                 | -0.74 | 0.08  | -1.78 | 0.68   | -0.99 | 0.68   | -4.40 | 0.02  | -3.34 | 0.03        |
| <b>Social function</b>            |       |       |       |        |       |        |       |       |       |             |
| Overall                           | -1.47 | -0.97 | -7.11 | <0.001 | -6.64 | <0.001 | -5.33 | 0.001 | -4.38 | 0.005       |
| Survivor no CRT                   | -1.26 | -0.98 | -6.86 | <0.001 | -6.68 | <0.001 | -5.18 | 0.001 | -4.37 | 0.007       |
| Survivor with CRT                 | -1.97 | -0.94 | -7.70 | <0.001 | -6.53 | <0.001 | -5.75 | 0.01  | -4.40 | 0.02        |
| <b>Mental health</b>              |       |       |       |        |       |        |       |       |       |             |
| Overall                           | -0.69 | -0.35 | -5.78 | 0.001  | -5.61 | <0.001 | -3.87 | 0.03  | -3.08 | <b>0.07</b> |
| Survivor no CRT                   | -0.63 | -0.44 | -5.57 | 0.002  | -5.54 | 0.001  | -4.11 | 0.02  | -3.39 | 0.05        |
| Survivor with CRT                 | -0.84 | -0.14 | -6.26 | 0.003  | -5.75 | 0.001  | -3.21 | 0.19  | -2.20 | 0.25        |
| <b>Physical component summary</b> |       |       |       |        |       |        |       |       |       |             |
| Overall                           | -2.32 | -1.92 | -4.33 | 0.05   | -3.74 | 0.11   | -2.01 | 0.88  | -1.13 | 0.70        |
| Survivor no CRT                   | -1.98 | -1.78 | -3.29 | 0.23   | -3.06 | 0.28   | -1.50 | 0.81  | -0.77 | 0.62        |
| Survivor with CRT                 | -3.18 | -2.28 | -6.76 | 0.008  | -5.35 | 0.03   | -3.41 | 0.92  | -2.11 | 0.94        |
| <b>Mental component summary</b>   |       |       |       |        |       |        |       |       |       |             |
| Overall                           | -0.31 | 0.02  | -5.73 | <0.001 | -5.67 | 0.001  | -4.19 | 0.01  | -3.46 | 0.02        |
| Survivor no CRT                   | -0.35 | -0.15 | -6.10 | <0.001 | -6.17 | <0.001 | -4.42 | 0.008 | -3.76 | 0.02        |
| Survivor with CRT                 | -0.22 | 0.46  | -4.85 | 0.009  | -4.50 | 0.007  | -3.55 | 0.07  | -2.61 | 0.08        |

SES, socioeconomic status; P=p-value for comparison of the difference between survivor and sibling without adjustment for SES in the model, referenced to non-Hispanic white survivor and sibling difference; P\*=p-value for comparison of the difference between survivor and sibling with an added adjustment for SES in the model, referenced to non-Hispanic White survivor and sibling difference. Adjusted for household income, education level and insurance status in addition to sex, age at follow-up, year at diagnosis, methotrexate exposure (intravenous and intrathecal), corticosteroid exposure, any CTCAE grade 3-4 chronic medical condition. Outcomes which became non-significant after the addition of current SES are bolded and italicized.

Supplemental Table 3. CCSS questionnaire completion by race/ethnicity for survivors, includes death prior to follow-up.

| Characteristic                   | Survivors, n(%)      |                     |                       |                     |                   |                    |                     |                   |                    |
|----------------------------------|----------------------|---------------------|-----------------------|---------------------|-------------------|--------------------|---------------------|-------------------|--------------------|
|                                  | White, NH            |                     |                       | Black, NH           |                   |                    | Hispanic            |                   |                    |
|                                  | Baseline<br>n=19,926 | Deceased<br>n=2,215 | Follow-up<br>n=12,287 | Baseline<br>n=1,521 | Deceased<br>n=199 | Follow-up<br>n=600 | Baseline<br>n=1,814 | Deceased<br>n=181 | Follow-up<br>n=821 |
| <b>Sex</b>                       |                      |                     |                       |                     |                   |                    |                     |                   |                    |
| Male                             | 10666 (53.5)         | 1312 (58.9)         | 6139 (49.8)           | 798 (52.5)          | 120 (61.7)        | 298 (48.8)         | 955 (54.0)          | 111 (61.4)        | 373 (45.4)         |
| Female                           | 9260 (46.5)          | 903 (41.1)          | 6148 (50.2)           | 723 (47.5)          | 79 (38.3)         | 302 (51.2)         | 859 (46.0)          | 70 (38.6)         | 448 (54.6)         |
| <b>Age at diagnosis (years)</b>  |                      |                     |                       |                     |                   |                    |                     |                   |                    |
| 0-4                              | 7750 (41.2)          | 602 (28.9)          | 4709 (40.2)           | 639 (43.9)          | 59 (29.7)         | 240 (41.1)         | 765 (45.1)          | 52 (28.7)         | 308 (39.5)         |
| 5-9                              | 4397 (23.2)          | 482 (22.5)          | 2733 (23.3)           | 367 (25.0)          | 55 (27.7)         | 134 (23.9)         | 449 (26.3)          | 45 (26.4)         | 233 (29.3)         |
| 10-14                            | 4290 (19.8)          | 537 (23.1)          | 2663 (20.2)           | 324 (20.0)          | 53 (27.2)         | 142 (22.5)         | 347 (16.8)          | 46 (24.7)         | 156 (17.8)         |
| 15-20                            | 3489 (15.7)          | 594 (25.5)          | 2182 (16.3)           | 191 (11.0)          | 32 (15.4)         | 84 (12.5)          | 253 (11.8)          | 38 (20.2)         | 124 (13.4)         |
| <b>Year of diagnosis</b>         |                      |                     |                       |                     |                   |                    |                     |                   |                    |
| 1970-79                          | 5886 (26.3)          | 1020 (43.6)         | 3842 (28.4)           | 255 (14.6)          | 65 (31.3)         | 114 (16.7)         | 304 (13.8)          | 52 (27.3)         | 155 (16.4)         |
| 1980-89                          | 8091 (38.8)          | 837 (37.7)          | 5313 (41.6)           | 596 (35.9)          | 74 (38.3)         | 274 (42.3)         | 634 (31.9)          | 69 (37.8)         | 322 (36.7)         |
| 1990-99                          | 5949 (35.0)          | 358 (18.7)          | 3132 (30.1)           | 670 (49.5)          | 60 (30.5)         | 212 (41.0)         | 876 (54.3)          | 60 (34.8)         | 344 (46.9)         |
| <b>Age at evaluation (years)</b> |                      |                     |                       |                     |                   |                    |                     |                   |                    |
| <25                              | 10274 (53.5)         | 734 (34.1)          | 2649 (22.6)           | 834 (56.9)          | 72 (35.9)         | 150 (26.3)         | 980 (57.0)          | 66 (36.1)         | 201 (26.6)         |
| 25-34                            | 7539 (36.9)          | 998 (45.1)          | 5738 (48.2)           | 558 (35.5)          | 90 (44.9)         | 297 (49.5)         | 658 (34.8)          | 79 (44.8)         | 407 (49.7)         |
| 35-44                            | 2067 (9.3)           | 461 (19.9)          | 3402 (25.5)           | 129 (7.6)           | 37 (19.2)         | 142 (22.6)         | 173 (8.0)           | 35 (18.6)         | 196 (21.9)         |
| 45-54                            | 46 (0.2)             | 22 (0.9)            | 498 (3.7)             | 0 (0.0)             | 0 (0.0)           | 11 (1.6)           | 3 (0.1)             | 1 (0.5)           | 17 (1.8)           |
| ≥55                              |                      |                     |                       |                     |                   |                    |                     |                   |                    |
| <b>Cancer diagnosis</b>          |                      |                     |                       |                     |                   |                    |                     |                   |                    |
| Acute lymphoblastic leukemia     | 5045 (33.5)          | 474 (25.6)          | 3216 (33.0)           | 290 (29.7)          | 28 (17.7)         | 133 (31.4)         | 524 (41.6)          | 41 (26.5)         | 232 (37.8)         |
| Acute myeloid leukemia           | 648 (2.9)            | 61 (2.6)            | 421 (3.1)             | 67 (3.8)            | 8 (3.9)           | 20 (2.9)           | 96 (4.3)            | 4 (2.1)           | 48 (5.1)           |
| Other leukemia                   | 232 (1.0)            | 51 (2.2)            | 118 (0.9)             | 22 (1.3)            | 5 (2.4)           | 5 (0.7)            | 28 (1.3)            | 8 (4.2)           | 13 (1.4)           |
| Astrocytoma                      | 2177 (9.7)           | 283 (12.1)          | 1279 (9.4)            | 137 (7.8)           | 26 (12.5)         | 54 (7.9)           | 169 (7.6)           | 24 (12.6)         | 87 (9.2)           |
| Medulloblastoma, PNET            | 782 (3.5)            | 112 (4.8)           | 468 (3.5)             | 62 (3.5)            | 12 (5.8)          | 34 (5.0)           | 93 (4.2)            | 19 (10.0)         | 29 (3.1)           |
| Other CNS tumors                 | 598 (2.7)            | 99 (4.2)            | 331 (2.4)             | 44 (2.5)            | 3 (1.4)           | 23 (3.4)           | 58 (2.6)            | 12 (6.3)          | 21 (2.2)           |
| Hodgkin lymphoma                 | 2534 (11.3)          | 405 (17.3)          | 1569 (11.6)           | 164 (9.4)           | 29 (14.0)         | 67 (9.8)           | 210 (9.5)           | 27 (14.2)         | 106 (11.2)         |
| Non-Hodgkin lymphoma             | 1630 (7.3)           | 124 (5.3)           | 992 (7.3)             | 120 (6.9)           | 14 (6.7)          | 45 (6.6)           | 124 (5.6)           | 8 (4.2)           | 54 (5.7)           |
| Kidney tumors                    | 1665 (7.4)           | 77 (3.3)            | 1097 (8.1)            | 267 (15.2)          | 20 (9.6)          | 96 (14.1)          | 150 (6.8)           | 10 (5.3)          | 67 (7.1)           |
| Neuroblastoma                    | 1534 (6.9)           | 101 (4.3)           | 864 (6.4)             | 107 (6.1)           | 15 (7.2)          | 32 (4.7)           | 129 (5.8)           | 7 (3.7)           | 57 (6.0)           |
| Soft tissue sarcoma              | 1423 (6.4)           | 165 (7.1)           | 919 (6.8)             | 127 (7.3)           | 21 (10.1)         | 48 (7.1)           | 90 (4.1)            | 9 (4.7)           | 38 (4.0)           |
| Ewing sarcoma                    | 647 (2.9)            | 138 (5.9)           | 377 (2.8)             | 7 (0.4)             | 1 (0.5)           | 3 (0.4)            | 32 (1.4)            | 3 (1.6)           | 16 (1.7)           |
| Osteosarcoma                     | 920 (4.1)            | 117 (5.0)           | 575 (4.2)             | 107 (6.1)           | 17 (8.2)          | 40 (5.9)           | 107 (4.8)           | 9 (4.7)           | 51 (5.4)           |
| Other bone tumors                | 91 (0.4)             | 8 (0.3)             | 61 (0.5)              | 0 (0.0)             | 0 (0.0)           | 0 (0.0)            | 4 (0.2)             | 0 (0.0)           | 2 (0.2)            |

Supplemental Table 3 continued. CCSS questionnaire completion by race/ethnicity for survivors, includes death prior to follow-up.

|                                  |              |             |              |             |            |            |             |            |            |  |
|----------------------------------|--------------|-------------|--------------|-------------|------------|------------|-------------|------------|------------|--|
| <b>Cranial radiation (maxTD)</b> |              |             |              |             |            |            |             |            |            |  |
| None                             | 12537 (70.6) | 1087 (58.1) | 7902 (70.3)  | 886 (72.6)  | 85 (56.7)  | 341 (68.7) | 1154 (74.4) | 89 (59.4)  | 536 (73.1) |  |
| >0-<20† Gy                       | 1685 (10.3)  | 147 (8.8)   | 1121 (10.5)  | 103 (11.2)  | 11 (10.9)  | 49 (13.6)  | 139 (9.7)   | 5 (4.8)    | 64 (9.9)   |  |
| ≥20 Gy                           | 3725 (19.1)  | 627 (33.2)  | 2341 (19.1)  | 217 (16.2)  | 46 (32.3)  | 101 (17.8) | 291 (15.9)  | 57 (35.8)  | 134 (17.1) |  |
| <b>Intravenous methotrexate</b>  |              |             |              |             |            |            |             |            |            |  |
| No                               | 14297 (72.8) | 1538 (75.0) | 9060 (73.9)  | 917 (65.9)  | 119 (76.7) | 361 (64.5) | 1243 (71.5) | 127 (77.2) | 584 (72.8) |  |
| Yes                              | 4120 (27.2)  | 421 (25.0)  | 2530 (26.1)  | 321 (34.1)  | 31 (23.3)  | 134 (35.5) | 398 (28.5)  | 32 (22.8)  | 175 (27.2) |  |
| <b>Intrathecal methotrexate</b>  |              |             |              |             |            |            |             |            |            |  |
| No                               | 12459 (60.0) | 1434 (69.3) | 7756 (60.7)  | 897 (61.6)  | 114 (71.9) | 347 (60.6) | 1075 (53.3) | 119 (70.7) | 503 (57.4) |  |
| Yes                              | 5958 (40.0)  | 525 (30.7)  | 3834 (39.3)  | 341 (38.4)  | 36 (28.1)  | 148 (39.4) | 566 (46.7)  | 40 (29.3)  | 256 (42.6) |  |
| <b>Systemic corticosteroid</b>   |              |             |              |             |            |            |             |            |            |  |
| No                               | 10726 (52.9) | 1108 (53.9) | 6697 (53.4)  | 819 (57.3)  | 107 (67.6) | 301 (52.6) | 947 (49.4)  | 91 (55.6)  | 436 (51.3) |  |
| Yes                              | 7691 (47.1)  | 851 (46.1)  | 4893 (46.6)  | 419 (42.7)  | 43 (32.4)  | 194 (47.4) | 694 (50.6)  | 68 (44.4)  | 323 (48.7) |  |
| <b>Health insurance status</b>   |              |             |              |             |            |            |             |            |            |  |
| Yes                              | 15905 (86.9) |             | 11021 (90.3) | 1054 (78.2) |            | 478 (79.5) | 1247 (73.9) |            | 696 (85.8) |  |
| No                               | 2321 (13.1)  |             | 1182 (9.7)   | 299 (21.8)  |            | 116 (20.5) | 403 (26.1)  |            | 123 (14.2) |  |
| <b>Household income (\$‡)</b>    |              |             |              |             |            |            |             |            |            |  |
| <20,000                          | 1696 (10.2)  |             | 1036 (10.1)  | 370 (31.5)  |            | 115 (27.6) | 261 (18.1)  |            | 105 (15.8) |  |
| 20-59,999                        | 5245 (30.1)  |             | 3134 (30.1)  | 449 (37.9)  |            | 198 (40.7) | 586 (39.1)  |            | 271 (39.9) |  |
| 60-99,999                        | 4781 (26.9)  |             | 2839 (26.3)  | 235 (19.8)  |            | 93 (19.0)  | 335 (21.9)  |            | 160 (23.2) |  |
| ≥100,000                         | 5882 (32.8)  |             | 3741 (33.5)  | 140 (10.9)  |            | 63 (12.8)  | 311 (20.9)  |            | 158 (21.1) |  |
| <b>Educational attainment</b>    |              |             |              |             |            |            |             |            |            |  |
| <High school graduate            | 832 (9.1)    |             | 327 (3.4)    | 94 (15.2)   |            | 22 (5.5)   | 103 (13.1)  |            | 38 (5.9)   |  |
| High school graduate             | 1610 (17.3)  |             | 1219 (12.4)  | 177 (26.0)  |            | 90 (18.6)  | 185 (22.0)  |            | 91 (15.2)  |  |
| College graduate                 | 6798 (73.6)  |             | 8067 (84.3)  | 392 (58.9)  |            | 336 (75.9) | 515 (64.9)  |            | 490 (79.0) |  |
| <b>Employment</b>                |              |             |              |             |            |            |             |            |            |  |
| Unemployed                       | 2315 (15.6)  |             | 2383 (19.2)  | 319 (29.4)  |            | 176 (28.8) | 324 (25.1)  |            | 209 (25.0) |  |
| Employed/student                 | 13178 (84.4) |             | 9904 (80.8)  | 786 (70.6)  |            | 424 (71.2) | 1020 (74.9) |            | 612 (75.0) |  |

Reported values for time-varying demographic (age at evaluation) and socioeconomic outcomes (employment, education, income and insurance status) were based on time of reported survey completion (baseline or follow-up).

Percentages were weighted to account for under-sampling of acute lymphoblastic leukemia survivors in latter era (1987–1999)

†Direct cranial radiation doses (not including stray/scatter). ‡Adjusted to 2016-dollar value. NH=non-Hispanic; maxTD=maximum tumor dose

Supplemental Table 4. CCSS questionnaire completion by race/ethnicity for siblings.

| Characteristic                   | Siblings, n(%)      |                      |                   |                   |                   |                    |
|----------------------------------|---------------------|----------------------|-------------------|-------------------|-------------------|--------------------|
|                                  | White, NH           |                      | Black, NH         |                   | Hispanic          |                    |
|                                  | Baseline<br>n=4,370 | Follow-up<br>n=2,882 | Baseline<br>n=149 | Follow-up<br>n=70 | Baseline<br>n=214 | Follow-up<br>n=103 |
| <b>Sex</b>                       |                     |                      |                   |                   |                   |                    |
| Male                             | 2097 (48.0)         | 1311 (45.5)          | 58 (38.9)         | 31 (44.0)         | 93 (43.5)         | 44 (43.0)          |
| Female                           | 2273 (52.0)         | 1571 (54.5)          | 91 (61.1)         | 39 (56.0)         | 121 (56.5)        | 59 (57.0)          |
| <b>Age at evaluation (years)</b> |                     |                      |                   |                   |                   |                    |
| <25                              | 1809 (41.4)         | 544 (18.9)           | 66 (44.3)         | 21 (30.0)         | 102 (47.7)        | 29 (28.2)          |
| 25-34                            | 1625 (37.2)         | 1076 (37.3)          | 47 (31.5)         | 25 (35.7)         | 79 (36.9)         | 43 (41.7)          |
| 35-44                            | 836 (19.1)          | 963 (33.4)           | 35 (23.5)         | 20 (28.6)         | 28 (13.1)         | 25 (24.3)          |
| 45-54                            | 99 (2.3)            | 288 (10.0)           | 1 (0.7)           | 4 (5.7)           | 5 (2.3)           | 5 (4.9)            |
| ≥55                              | 1 (0.0)             | 11 (0.4)             | 0 (0.0)           | 0 (0.0)           | 0 (0.0)           | 1 (1.0)            |
| <b>Health insurance status</b>   |                     |                      |                   |                   |                   |                    |
| Yes                              | 3906 (90.5)         | 2630 (91.6)          | 123 (84.2)        | 61 (87.1)         | 172 (82.7)        | 83 (81.4)          |
| No                               | 412 (9.5)           | 241 (8.4)            | 23 (15.8)         | 9 (12.9)          | 36 (17.3)         | 19 (18.6)          |
| <b>Household income (\$‡)</b>    |                     |                      |                   |                   |                   |                    |
| <20,000                          | 221 (5.6)           | 125 (4.8)            | 23 (19.7)         | 5 (10.6)          | 16 (8.5)          | 8 (9.1)            |
| 20-59,999                        | 1018 (25.7)         | 555 (21.2)           | 33 (28.2)         | 14 (29.8)         | 59 (31.4)         | 23 (26.1)          |
| 60-99,999                        | 1106 (27.9)         | 673 (25.7)           | 34 (29.1)         | 15 (31.9)         | 50 (26.6)         | 32 (36.4)          |
| ≥100,000                         | 1619 (40.8)         | 1266 (48.3)          | 27 (23.1)         | 13 (27.7)         | 63 (33.5)         | 25 (28.4)          |
| <b>Educational attainment</b>    |                     |                      |                   |                   |                   |                    |
| <High school graduate            | 93 (3.8)            | 36 (1.5)             | 6 (7.3)           | 0 (0.0)           | 7 (6.6)           | 1 (1.4)            |
| High school graduate             | 365 (14.8)          | 253 (10.8)           | 21 (25.6)         | 10 (20.4)         | 15 (14.2)         | 8 (10.8)           |
| College graduate                 | 2004 (81.4)         | 2048 (87.6)          | 55 (67.1)         | 39 (79.6)         | 84 (79.2)         | 65 (87.8)          |
| <b>Employment</b>                |                     |                      |                   |                   |                   |                    |
| Unemployed                       | 429 (10.8)          | 325 (11.3)           | 27 (21.8)         | 8 (11.4)          | 36 (18.9)         | 15 (14.5)          |
| Employed/student                 | 3545 (89.2)         | 2557 (88.7)          | 97 (78.2)         | 62 (88.6)         | 154 (81.1)        | 88 (85.4)          |

Reported values for time-varying demographic (age at evaluation) and socioeconomic outcomes (employment, education, income and insurance status) were based on time of reported survey completion (baseline or follow-up).

‡Adjusted to 2016-dollar value. NH=non-Hispanic.
